# Supplementary material for: Acquisition and Longevity of Antibodies to Plasmodium vivax Preerythrocytic Antigens in Western Thailand
Source: PubMed Central journal article supplement (PMC4744911; doi:10.1128/cvi.00501-15), 2016-02-05
Supplement: CVI.00501-15_zcd999095301so1.pdf [file CVI.00501-15_zcd999095301so1.pdf]

## SUPPLEMENTAL MATERIAL

### SUPPLEMENTAL FIGURES

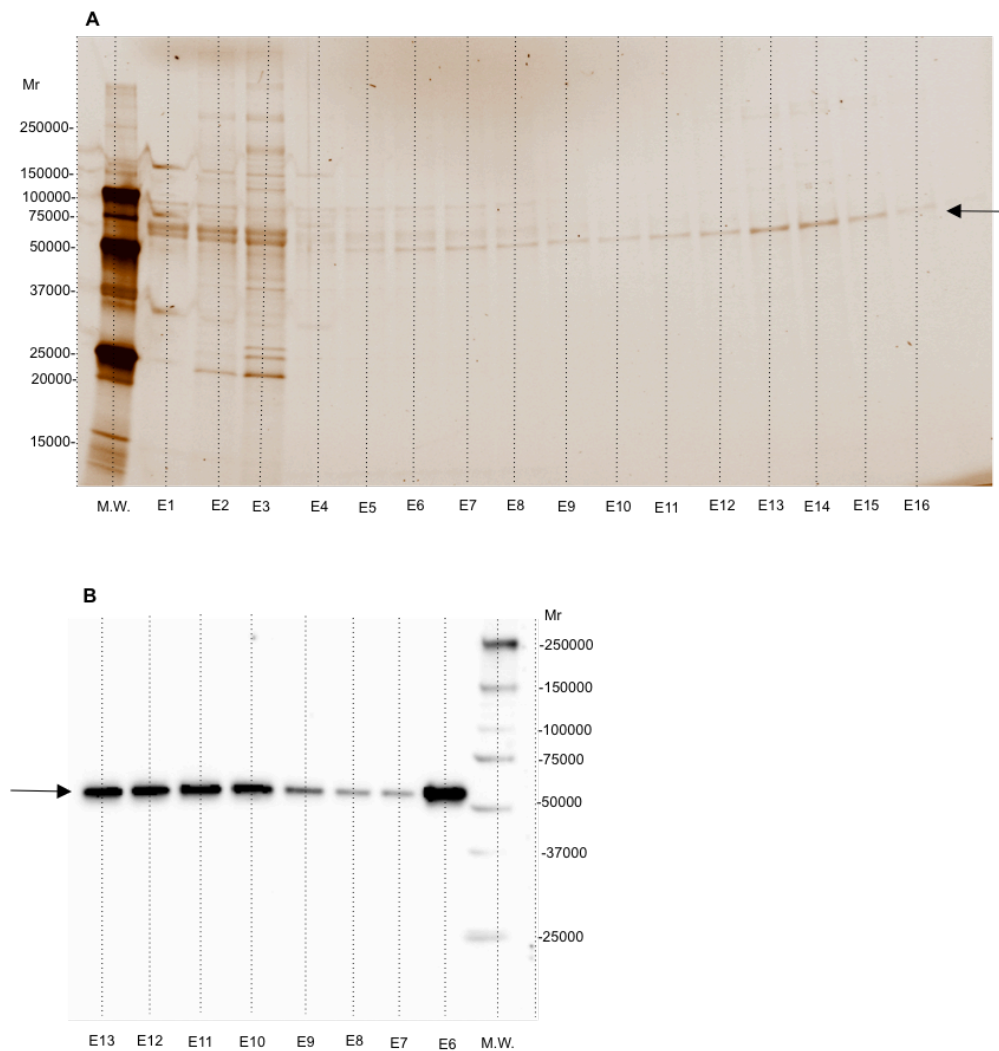

**FIG S1** Silver staining and western blot analyses of *P. vivax* CSP247 protein after SEC purification. (A) Elution samples after SEC purification were submitted to 12.5% SDS-PAGE under reducing conditions and stained with silver stain. E6 to E13 elution fractions were selected for western blot analyses (B) using a monoclonal antibody (MRA-1028K sporozoite ELISA kit, Malaria Research and Reference Reagent Resource Center (MRA4)) for CSP247. The expected size of *P. vivax* CSP247 was 50 kDa and was estimated by comparison with known molecular weight standards (Lane 1). These elution samples were concentrated for the ELISA assay.

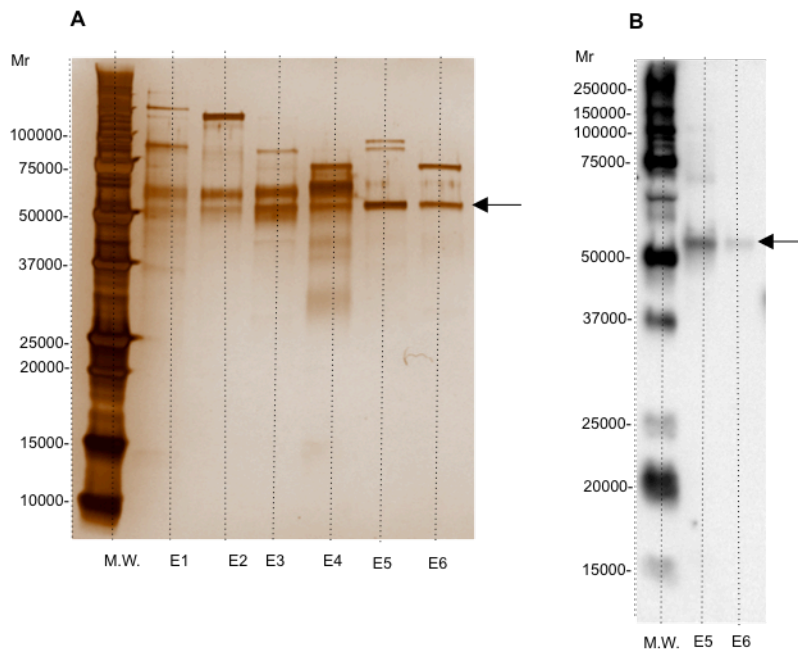

**FIG S2** Silver staining and western blot analyses of *P. vivax* CSP210 protein after SEC purification. (A) Elution samples after SEC purification were submitted to 12.5% SDS-PAGE under reducing conditions and stained with silver stain. E5 and E6 elution fractions were selected for western blot analyses (B) using a monoclonal antibody (MRA-1028K sporozoite ELISA kit, Malaria Research and Reference Reagent Resource Center (MRA4)) for CSP210. The expected size of *P. vivax* CSP210 was 50 kDa and was estimated by comparison with known molecular weight standards (Lane 1). These elution samples were concentrated for the ELISA assay.

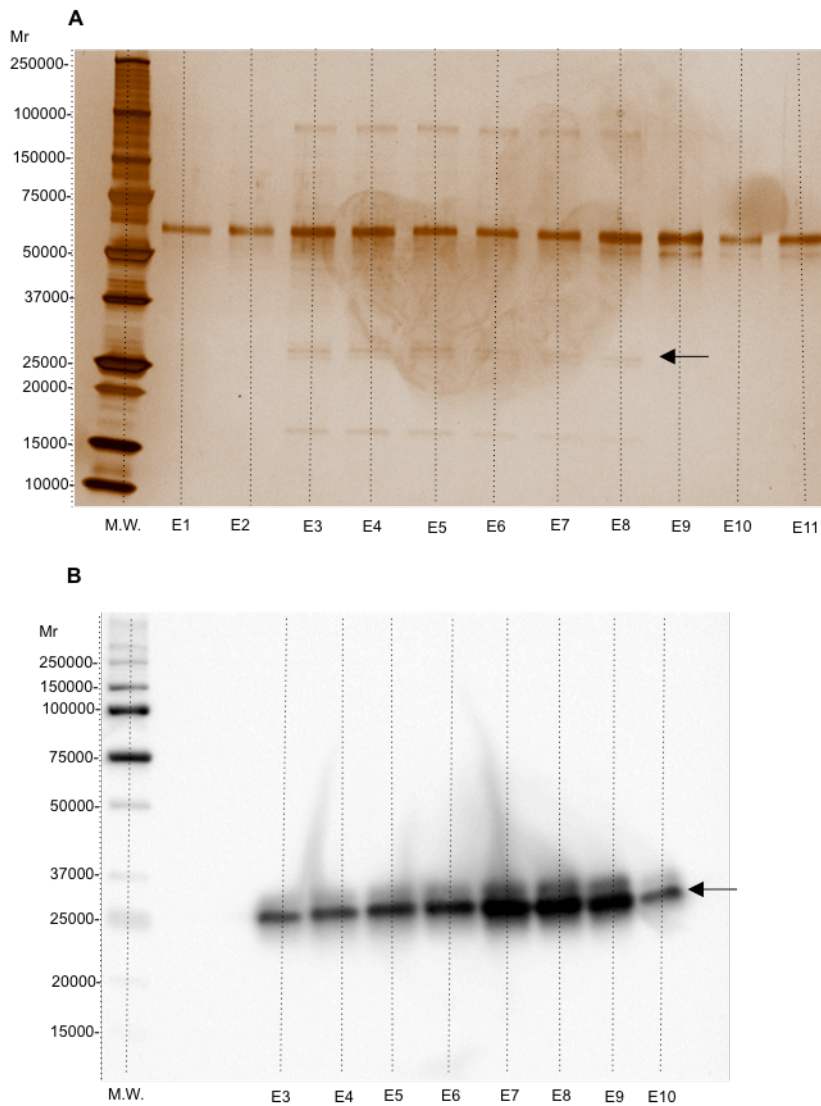

**FIG S3** Silver staining and western blot analyses of *P. vivax* CeltOS protein after SEC purification. (A) Elution samples after SEC purification were submitted to 12.5% SDS-PAGE under reducing conditions and stained with silver stain. E3 to E10 elution fractions were selected for western blot analyses (B) using a 6X-His Epitope tag horseradish peroxidase conjugated monoclonal antibody. The expected size of *P. vivax* CeltOS was 30 kDa and was estimated by comparison with known molecular weight standards (Lane 1). These elution samples were concentrated for the ELISA assay.

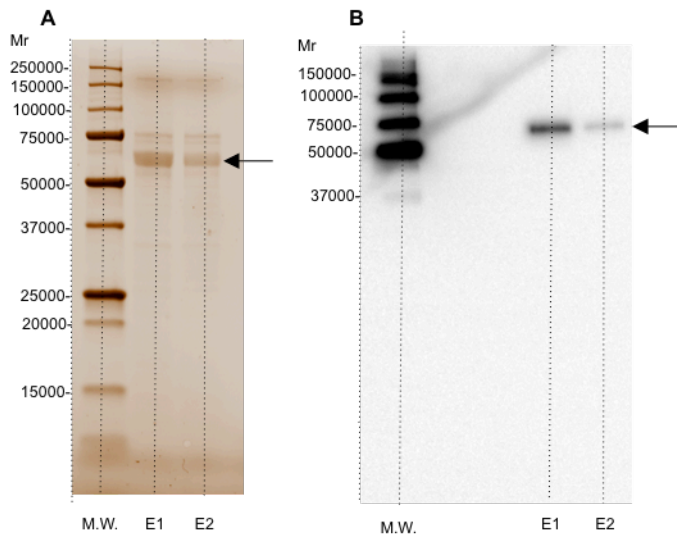

**FIG S4** Silver staining and western blot analyses of *P. vivax* TRAP protein after SEC purification. (A) Elution samples after SEC purification were submitted to 12.5% SDS-PAGE under reducing conditions and stained with silver stain. E1 and E2 elution fractions were selected for western blot analyses (B) using a 6X-His Epitope tag horseradish peroxidase conjugated monoclonal antibody. The expected size of *P. vivax* TRAP was 60 kDa and was estimated by comparison with known molecular weight standards (Lane 1). These elution samples were concentrated for the ELISA assay.

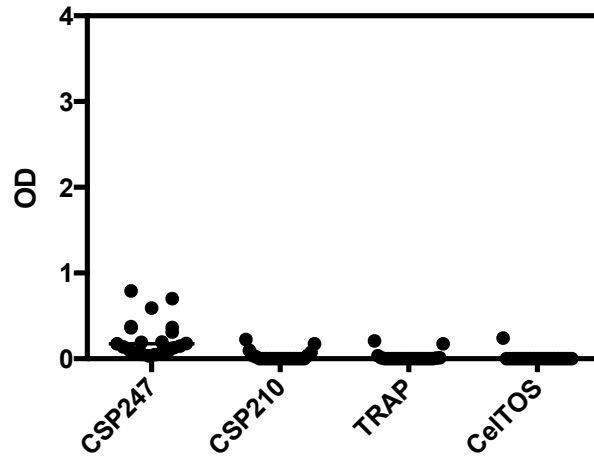

**FIG S5** IgG responses to Pv proteins CSP247, CSP210, TRAP and CelTOS in 21 uninfected children from Western Thailand. Individual data points and the median are shown.

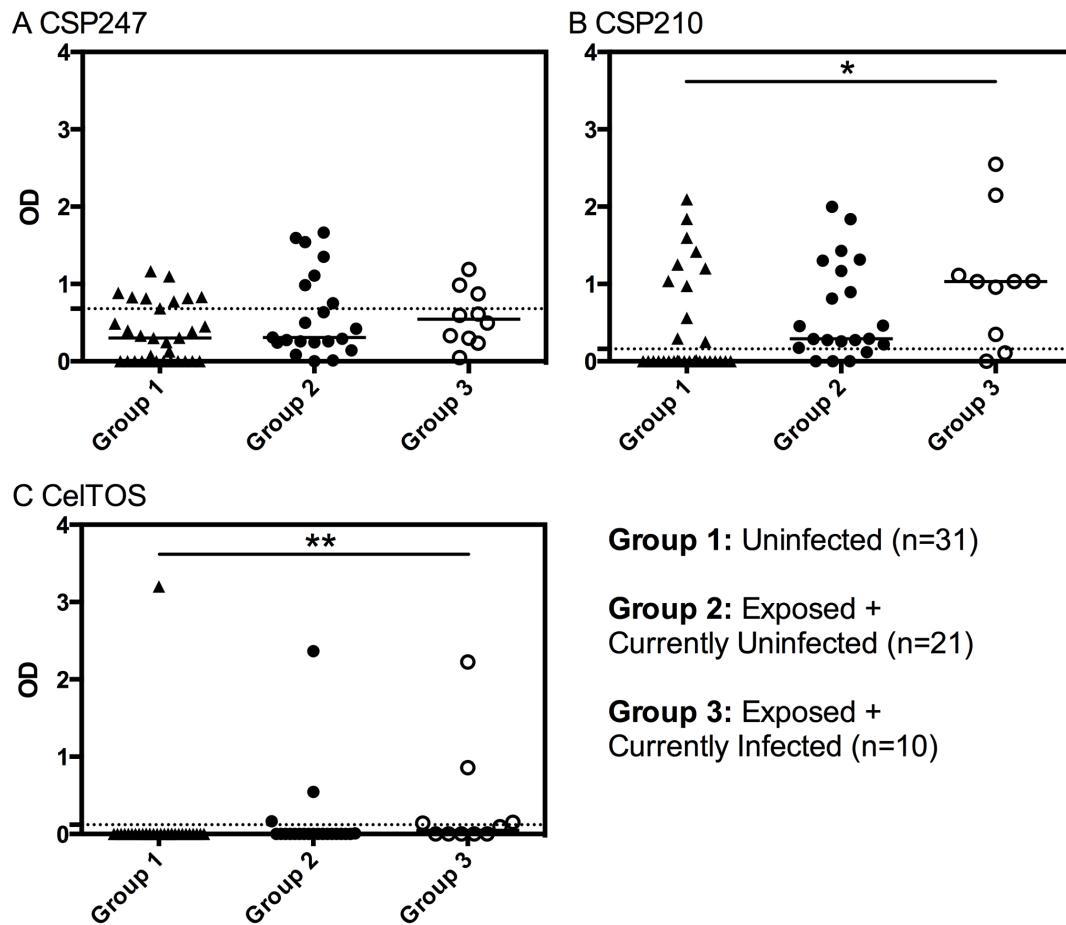

**FIG S6** IgG magnitude and the effect of current blood-stage *P. vivax* infections. IgG responses to Pv (A) CSP247 (B) CSP210 and (C) CelTOS at visit 14. Volunteers are stratified into those uninfected throughout the cohort (Group A, n=31), those exposed but currently uninfected (Group B, n=21) and those exposed but currently infected (Group C, n=10). The dashed line represents protein-specific positivity cut-offs. Statistical difference between the three groups was assessed using the Kruskal-Wallis test with Dunn's multiple comparisons test. \*  $p < 0.05$ , \*\*  $p < 0.01$ .

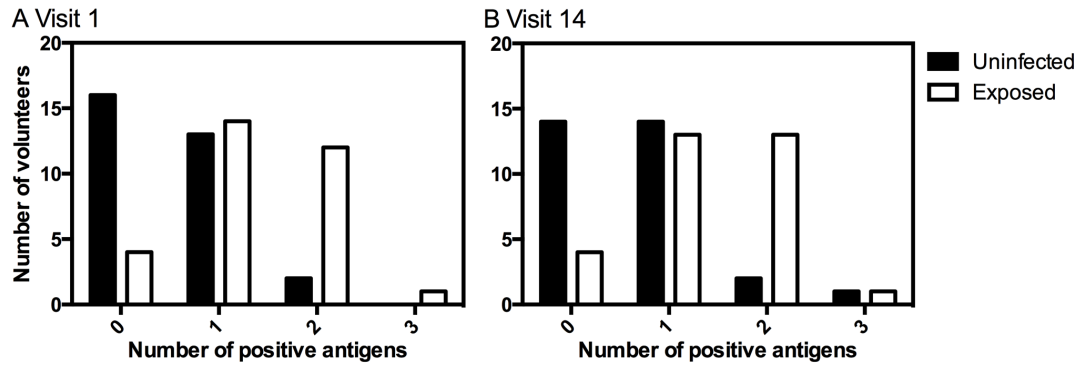

**FIG S7** Breadth of the IgG response. The number of Pv proteins each volunteer was IgG positive for after protein-specific positivity cut-offs is shown, stratified by exposure status (n=31 in each group). (A) Visit 1 and (B) Visit 14.
